# Supplementary material for: Improved islet recovery and efficacy through co-culture and co-transplantation of islets with human adipose-derived mesenchymal stem cells
Source: PubMed Central journal article supplement (PMC6231609; doi:10.1371/journal.pone.0206449), 2018-11-12
Supplement: pone.0206449.s002.pdf [file pone.0206449.s002.pdf]

### Cellular Component

| Condition                                    | Insulin Content (ng) | $\beta$ %       | $\alpha$ %      |
|----------------------------------------------|----------------------|-----------------|-----------------|
| Islets Alone<br>(48-hour culture)            | $2.07 \pm 0.78$      | $1.84 \pm 0.93$ | $1.38 \pm 0.74$ |
| Islets + 1:2000 Ad-MSCs<br>(48-hour culture) | $3.07 \pm 1.2$       | $1.40 \pm 1.08$ | $1.42 \pm 0.59$ |
